# Supplementary material for: Constructing a prognostic immune-related lncRNA model for colon cancer
Source: Research Square preprint supplement (doi:10.21203/rs.3.rs-1313024/v1), 2022-02-02
Supplement: Supplementary file 1 [file 62886199a687d5721baab2d5.docx]

| **Supplementary Table 1.** A total of 894 irlncRNAs were identified by coexpression analysis. | | | | |
| --- | --- | --- | --- | --- |
| gene | conMean | logFC | pValue | Regulation |
| CDKN2B-AS1 | 10.5636 | -4.8609 | 1.01E-25 | negative |
| B3GALT5-AS1 | 3.8972 | -4.1554 | 1.93E-19 | negative |
| AC092723.1 | 4.11745 | -3.2703 | 8.86E-24 | negative |
| AP001554.1 | 3.96932 | -3.1612 | 5.03E-24 | negative |
| UBXN10-AS1 | 4.34491 | -2.6569 | 2.58E-10 | negative |
| LINC01082 | 6.94988 | -2.4663 | 1.77E-24 | negative |
| AC005392.2 | 14.7993 | -2.4616 | 1.37E-11 | negative |
| MBNL1-AS1 | 2.81561 | -2.4084 | 1.79E-19 | negative |
| LINC02441 | 15.032 | -2.3433 | 3.49E-22 | negative |
| LINC01752 | 9.94164 | -2.1181 | 4.26E-20 | negative |
| AC016888.1 | 9.85116 | -2.0051 | 1.12E-16 | negative |
| FENDRR | 5.78278 | -1.7747 | 2.38E-20 | negative |
| AC009509.2 | 1.90072 | -1.6955 | 2.26E-16 | negative |
| AC010998.3 | 1.37798 | -1.6884 | 2.35E-17 | negative |
| AC015922.2 | 8.15836 | -1.6682 | 1.66E-21 | negative |
| MIR22HG | 11.8632 | -1.6056 | 3.33E-22 | negative |
| B4GALT1-AS1 | 3.44282 | -1.5973 | 6.82E-22 | negative |
| LINC02362 | 1.45098 | -1.5401 | 4.14E-13 | negative |
| AL135905.1 | 2.41178 | -1.5289 | 4.86E-20 | negative |
| SERTAD4-AS1 | 2.83892 | -1.457 | 1.18E-08 | negative |
| AC015922.3 | 6.0342 | -1.4178 | 7.25E-19 | negative |
| LINC02381 | 1.98489 | -1.3514 | 2.71E-18 | negative |
| AC092868.2 | 7.44389 | -1.345 | 2.29E-16 | negative |
| USP30-AS1 | 5.3828 | -1.2925 | 7.97E-11 | negative |
| AC090152.1 | 2.196 | -1.2498 | 4.78E-16 | negative |
| AL158837.1 | 1.16456 | -1.2136 | 9.28E-16 | negative |
| AC087277.2 | 1.81073 | -1.2105 | 1.11E-13 | negative |
| AC007637.1 | 1.11773 | -1.171 | 2.74E-18 | negative |
| AC120498.10 | 1.20957 | -1.1654 | 3.44E-13 | negative |
| LINC01871 | 5.77857 | -1.135 | 6.73E-11 | negative |
| AC006333.1 | 5.47596 | -1.0855 | 1.73E-19 | negative |
| AC254629.1 | 8.38899 | -1.0784 | 3.29E-12 | negative |
| NALT1 | 1.3417 | -1.0664 | 0.00414 | negative |
| AC018521.6 | 1.38114 | -1.0612 | 1.79E-15 | negative |
| SATB2-AS1 | 5.9017 | -1.0364 | 5.97E-12 | negative |
| MIR100HG | 1.4592 | -1.0312 | 1.45E-06 | negative |
| LINC01389 | 3.06106 | -1.0055 | 8.23E-12 | negative |
| LINC00294 | 5.148 | -0.9795 | 7.19E-21 | negative |
| AC005550.2 | 1.42403 | -0.9751 | 2.77E-12 | negative |
| AC092287.1 | 1.23046 | -0.9607 | 8.00E-14 | negative |
| ZNF710-AS1 | 3.58476 | -0.934 | 8.70E-11 | negative |
| LINC00578 | 1.14139 | -0.9003 | 0.00119 | negative |
| AC022509.3 | 1.26497 | -0.8746 | 1.14E-09 | negative |
| AP002498.1 | 3.26534 | -0.8692 | 2.09E-13 | negative |
| AL136084.3 | 1.29926 | -0.8658 | 0.00013 | negative |
| TP53TG1 | 20.8177 | -0.834 | 3.30E-15 | negative |
| FAM160A1-DT | 1.74081 | -0.8268 | 1.96E-10 | negative |
| AL451042.2 | 1.09649 | -0.8244 | 8.11E-12 | negative |
| LINC02446 | 0.93241 | -0.8178 | 9.36E-05 | negative |
| AL133371.2 | 0.87512 | -0.8159 | 3.30E-10 | negative |
| AC090579.1 | 1.15985 | -0.8055 | 2.51E-10 | negative |
| AL451042.1 | 0.88285 | -0.7833 | 3.06E-09 | negative |
| MIR3936HG | 1.38001 | -0.7827 | 2.19E-10 | negative |
| AC011523.1 | 1.33724 | -0.7769 | 1.45E-10 | negative |
| BX255925.1 | 0.99809 | -0.7687 | 9.44E-10 | negative |
| MAGI2-AS3 | 0.81358 | -0.7581 | 1.83E-10 | negative |
| AC067930.3 | 0.85516 | -0.7564 | 7.07E-05 | negative |
| AC104083.1 | 4.60155 | -0.7391 | 0.00045 | negative |
| AL139246.3 | 4.90978 | -0.714 | 2.89E-09 | negative |
| AL133355.1 | 1.65735 | -0.6829 | 1.88E-14 | negative |
| AC016727.1 | 1.12672 | -0.6649 | 3.82E-17 | negative |
| PCED1B-AS1 | 1.59834 | -0.6419 | 1.51E-07 | negative |
| AC009133.1 | 3.69433 | -0.6357 | 1.25E-10 | negative |
| AC138207.5 | 1.60509 | -0.6184 | 1.76E-07 | negative |
| SPINT1-AS1 | 14.8736 | -0.6148 | 1.71E-09 | negative |
| AL157394.1 | 0.74745 | -0.5934 | 1.58E-11 | negative |
| AC098484.1 | 1.85003 | -0.5575 | 1.40E-12 | negative |
| AL078581.2 | 1.06897 | -0.5489 | 9.02E-11 | negative |
| AC025580.2 | 0.84456 | -0.5461 | 5.54E-10 | negative |
| LINC01637 | 4.89618 | -0.5266 | 1.66E-07 | negative |
| AC090114.2 | 1.36879 | -0.5255 | 1.41E-09 | negative |
| AC090559.1 | 0.88027 | -0.5235 | 2.20E-08 | negative |
| ZSCAN16-AS1 | 1.64649 | -0.508 | 1.80E-06 | negative |
| AC027644.3 | 1.13544 | -0.501 | 2.24E-07 | negative |
| LINC01843 | 7.89506 | -0.4977 | 2.52E-07 | negative |
| SEMA3B-AS1 | 1.11207 | -0.4888 | 6.98E-05 | negative |
| AP003486.1 | 1.86742 | -0.482 | 3.87E-09 | negative |
| ACTA2-AS1 | 0.96176 | -0.4769 | 0.00194 | negative |
| AL359962.1 | 0.6914 | -0.4749 | 0.00017 | negative |
| AF131215.5 | 1.21784 | -0.4709 | 3.07E-06 | negative |
| AC002401.3 | 0.91131 | -0.4689 | 4.70E-06 | negative |
| AC131097.1 | 0.896 | -0.4577 | 0.00338 | negative |
| AC124248.1 | 2.63604 | -0.457 | 7.55E-05 | negative |
| AC010976.2 | 0.95009 | -0.4499 | 0.08155 | negative |
| MIR600HG | 1.07977 | -0.4468 | 1.68E-06 | negative |
| AC003102.1 | 1.29086 | -0.4415 | 1.47E-06 | negative |
| LINC00641 | 1.47295 | -0.4367 | 7.86E-06 | negative |
| AC127521.1 | 1.73557 | -0.4232 | 9.66E-05 | negative |
| AC008669.1 | 0.88152 | -0.4184 | 7.93E-07 | negative |
| PLBD1-AS1 | 2.67404 | -0.4159 | 8.66E-06 | negative |
| AC104695.3 | 0.81385 | -0.415 | 0.00031 | negative |
| LINC00482 | 0.93632 | -0.4141 | 4.08E-06 | negative |
| LINC00926 | 1.13515 | -0.411 | 0.00187 | negative |
| TRIM52-AS1 | 5.57893 | -0.4008 | 6.84E-06 | negative |
| TNFRSF14-AS1 | 2.77456 | -0.4004 | 1.26E-06 | negative |
| AC012181.2 | 1.14427 | -0.3985 | 5.72E-05 | negative |
| AC133552.5 | 1.65727 | -0.3961 | 4.74E-07 | negative |
| DNMBP-AS1 | 1.67873 | -0.3957 | 1.54E-06 | negative |
| AC092368.3 | 1.4112 | -0.3939 | 4.14E-05 | negative |
| AC018647.2 | 2.35344 | -0.3737 | 9.65E-07 | negative |
| AL078581.1 | 1.48784 | -0.3725 | 0.00022 | negative |
| FGD5-AS1 | 34.8111 | -0.3663 | 1.38E-09 | negative |
| LINC01023 | 3.0055 | -0.3661 | 5.62E-06 | negative |
| AC004080.2 | 3.45817 | -0.3514 | 0.00199 | negative |
| AC012181.1 | 0.86999 | -0.3442 | 3.84E-05 | negative |
| HOTAIRM1 | 3.10855 | -0.344 | 1.24E-05 | negative |
| SLC25A25-AS1 | 7.88715 | -0.3401 | 3.15E-05 | negative |
| AC005840.4 | 1.52676 | -0.3394 | 2.21E-05 | negative |
| AC008537.2 | 0.66356 | -0.3361 | 1.20E-06 | negative |
| LINC02035 | 1.18846 | -0.3359 | 3.72E-07 | negative |
| AC012236.1 | 1.13505 | -0.3276 | 0.00377 | negative |
| LINC00654 | 1.59014 | -0.3208 | 1.71E-07 | negative |
| AL031775.2 | 1.16458 | -0.32 | 1.17E-08 | negative |
| AC104794.3 | 1.32522 | -0.3171 | 0.01838 | negative |
| MIR194-2HG | 5.57746 | -0.3151 | 0.00041 | negative |
| AL049555.1 | 9.1628 | -0.3147 | 0.00022 | negative |
| PAXIP1-AS2 | 1.40258 | -0.3034 | 7.94E-05 | negative |
| AC040977.1 | 2.64062 | -0.3014 | 5.39E-05 | negative |
| OIP5-AS1 | 8.01303 | -0.2976 | 1.27E-07 | negative |
| DGUOK-AS1 | 2.50523 | -0.2973 | 0.0005 | negative |
| AP003065.1 | 1.05416 | -0.2973 | 0.00408 | negative |
| AL121603.2 | 1.35781 | -0.295 | 0.00013 | negative |
| AL122035.1 | 0.95676 | -0.2826 | 0.00094 | negative |
| AC073508.3 | 1.89773 | -0.2798 | 0.00011 | negative |
| NIFK-AS1 | 1.54556 | -0.2752 | 0.00065 | negative |
| ELN-AS1 | 1.21842 | -0.2719 | 0.00037 | negative |
| AC008035.1 | 1.01824 | -0.2711 | 0.00013 | negative |
| AC005332.6 | 8.05062 | -0.2655 | 7.33E-07 | negative |
| AC116366.1 | 1.93055 | -0.2648 | 2.99E-05 | negative |
| CARD8-AS1 | 1.74978 | -0.264 | 0.01433 | negative |
| AC009812.4 | 0.61688 | -0.2637 | 0.00027 | negative |
| ZNF236-DT | 0.95079 | -0.2618 | 9.53E-05 | negative |
| AL122010.1 | 2.63091 | -0.2517 | 5.17E-05 | negative |
| AC093726.1 | 1.75577 | -0.2484 | 7.69E-05 | negative |
| AC090617.5 | 1.51307 | -0.2484 | 8.19E-06 | negative |
| AC005674.2 | 0.68895 | -0.2482 | 0.00135 | negative |
| AL033384.2 | 0.61203 | -0.2472 | 0.01018 | negative |
| GAS5-AS1 | 1.23287 | -0.2446 | 2.00E-07 | negative |
| AC012306.2 | 2.14374 | -0.2353 | 0.00102 | negative |
| AC027607.1 | 0.58126 | -0.2331 | 3.57E-05 | negative |
| AL139246.5 | 2.02698 | -0.2295 | 0.00277 | negative |
| AC008124.1 | 1.62537 | -0.2163 | 2.34E-05 | negative |
| AC024075.1 | 1.7243 | -0.2161 | 0.0008 | negative |
| AC009113.1 | 1.34818 | -0.2116 | 0.00047 | negative |
| AC008764.2 | 2.73686 | -0.2104 | 0.00267 | negative |
| AC022400.1 | 0.9769 | -0.2087 | 0.08506 | negative |
| AC019330.1 | 0.68759 | -0.2048 | 1.05E-09 | negative |
| AC090948.2 | 0.68331 | -0.1978 | 8.05E-09 | negative |
| AP001189.3 | 0.71433 | -0.1976 | 0.01291 | negative |
| AL357033.3 | 2.07676 | -0.197 | 0.0002 | negative |
| AC093010.2 | 5.20663 | -0.1875 | 0.00866 | negative |
| AC009065.5 | 1.05738 | -0.1868 | 0.00082 | negative |
| AC027020.2 | 0.76582 | -0.1836 | 0.01085 | negative |
| NRSN2-AS1 | 4.39996 | -0.1828 | 0.00167 | negative |
| AGBL5-IT1 | 0.81245 | -0.1814 | 0.02041 | negative |
| AL158212.3 | 1.39418 | -0.1789 | 0.00077 | negative |
| AL139099.4 | 1.64984 | -0.1717 | 0.00233 | negative |
| AL035413.1 | 2.09145 | -0.1685 | 0.00635 | negative |
| RARA-AS1 | 2.42023 | -0.1678 | 6.37E-10 | negative |
| AC012317.1 | 0.79175 | -0.1601 | 6.12E-05 | negative |
| PPP3CB-AS1 | 0.82098 | -0.1508 | 5.59E-07 | negative |
| RAB11B-AS1 | 2.65374 | -0.1491 | 0.01574 | negative |
| AL357033.4 | 3.3296 | -0.1471 | 0.00323 | negative |
| AC145098.1 | 0.79361 | -0.1465 | 0.17511 | negative |
| LINC01137 | 3.81408 | -0.144 | 0.06816 | negative |
| AC073569.2 | 1.43825 | -0.1415 | 0.07345 | negative |
| PSMB8-AS1 | 5.7496 | -0.1367 | 0.20083 | negative |
| AC024075.3 | 1.13423 | -0.1317 | 0.00047 | negative |
| AC008906.1 | 1.14364 | -0.1274 | 2.89E-05 | negative |
| AGAP1-IT1 | 1.15894 | -0.1265 | 1.79E-06 | negative |
| TAPT1-AS1 | 0.87711 | -0.1254 | 0.02965 | negative |
| AL512791.1 | 1.58411 | -0.1104 | 0.05423 | negative |
| AC067852.2 | 2.174 | -0.1097 | 0.08994 | negative |
| AC019131.2 | 0.90037 | -0.1086 | 0.00478 | negative |
| AC147067.1 | 1.36209 | -0.1021 | 0.01052 | negative |
| AC092755.1 | 0.60737 | -0.0904 | 3.39E-06 | negative |
| SH3BP5-AS1 | 0.75624 | -0.0878 | 0.00781 | negative |
| FLNB-AS1 | 0.83769 | -0.0877 | 0.01032 | negative |
| HNF1A-AS1 | 3.00172 | -0.0842 | 0.01774 | negative |
| AC025181.2 | 4.71753 | -0.0795 | 0.02506 | negative |
| USP46-AS1 | 1.49506 | -0.0785 | 0.04325 | negative |
| AL136295.7 | 1.80497 | -0.0781 | 0.01469 | negative |
| AL596325.2 | 0.93895 | -0.0632 | 0.00113 | negative |
| LINC01578 | 6.38664 | -0.0616 | 0.00031 | negative |
| GAU1 | 10.1007 | -0.0585 | 0.00906 | negative |
| AL606834.2 | 0.63808 | -0.0583 | 0.00117 | negative |
| AL158206.1 | 3.37354 | -0.0571 | 0.067 | negative |
| LINC01116 | 1.35895 | -0.0441 | 0.00036 | negative |
| AC091563.1 | 4.01164 | -0.0406 | 0.45274 | negative |
| FOXD2-AS1 | 4.87262 | -0.0356 | 0.09395 | negative |
| AL021878.2 | 0.65217 | -0.0315 | 0.24437 | negative |
| AC092953.2 | 0.65754 | -0.0295 | 0.04497 | negative |
| NDUFV2-AS1 | 0.74478 | -0.0284 | 7.58E-06 | negative |
| AC022150.2 | 1.72715 | -0.0237 | 0.20747 | negative |
| AC022762.2 | 0.88838 | -0.0235 | 0.12063 | negative |
| AC138207.4 | 0.62023 | -0.0173 | 0.00091 | negative |
| AP004608.1 | 1.138 | -0.0055 | 0.06635 | negative |
| HOXA11-AS | 6.38366 | -0.0011 | 0.29925 | negative |
| HCP5 | 20.48 | 0.07649 | 0.79081 | postive |
| TRAM2-AS1 | 2.20428 | 0.07985 | 0.67062 | postive |
| SERPINB9P1 | 0.7108 | 0.091 | 0.83331 | postive |
| AC011476.3 | 0.89032 | 0.09413 | 0.66663 | postive |
| AC002467.1 | 1.93647 | 0.11193 | 0.91272 | postive |
| AC135050.6 | 11.4087 | 0.11232 | 0.3612 | postive |
| AC037459.2 | 0.77908 | 0.1133 | 0.94756 | postive |
| AC083799.1 | 6.56582 | 0.11355 | 0.99038 | postive |
| WAC-AS1 | 6.51539 | 0.13827 | 0.24438 | postive |
| AL049840.4 | 1.36385 | 0.14997 | 0.69071 | postive |
| RAD51-AS1 | 1.90875 | 0.15036 | 0.54441 | postive |
| AL604028.1 | 2.46394 | 0.15076 | 0.35661 | postive |
| AL160006.1 | 1.32223 | 0.16989 | 0.35546 | postive |
| PSMA3-AS1 | 3.55527 | 0.17559 | 0.57614 | postive |
| AC011472.1 | 1.20229 | 0.18166 | 0.11321 | postive |
| NUTM2A-AS1 | 1.23792 | 0.1932 | 0.29874 | postive |
| ATP1A1-AS1 | 0.97957 | 0.19964 | 0.90663 | postive |
| SNHG18 | 11.8799 | 0.20949 | 0.2735 | postive |
| ARMCX5-GPRASP2 | 1.1093 | 0.21432 | 0.19284 | postive |
| AC108860.2 | 1.27423 | 0.21556 | 0.74974 | postive |
| PRKCZ-AS1 | 1.16979 | 0.22524 | 0.61796 | postive |
| AC092747.4 | 2.1857 | 0.22784 | 0.50512 | postive |
| AL022328.2 | 1.08048 | 0.23357 | 0.24129 | postive |
| AL021707.3 | 0.87456 | 0.23866 | 0.58741 | postive |
| AP001486.2 | 0.47122 | 0.24378 | 0.92403 | postive |
| PINK1-AS | 1.25696 | 0.25429 | 0.14011 | postive |
| AC025171.1 | 0.85941 | 0.25675 | 0.61103 | postive |
| TOLLIP-AS1 | 0.9398 | 0.26024 | 0.2842 | postive |
| AP000759.1 | 1.42169 | 0.26118 | 0.19738 | postive |
| HCG11 | 2.13207 | 0.26371 | 0.60642 | postive |
| AL365203.2 | 0.82501 | 0.2658 | 0.36641 | postive |
| AL022328.1 | 0.61532 | 0.26592 | 0.34527 | postive |
| DGCR11 | 0.82243 | 0.26973 | 0.2842 | postive |
| AC068580.3 | 0.75298 | 0.26974 | 0.37167 | postive |
| AL392172.1 | 2.16383 | 0.27701 | 0.00237 | postive |
| U62317.1 | 0.70194 | 0.27906 | 0.40418 | postive |
| ARRDC1-AS1 | 3.30449 | 0.28269 | 0.00457 | postive |
| AC084018.1 | 1.87899 | 0.28528 | 0.08546 | postive |
| AL031775.1 | 0.82936 | 0.28581 | 0.13981 | postive |
| AC073046.1 | 1.15817 | 0.29098 | 0.96765 | postive |
| OTUD6B-AS1 | 3.28074 | 0.29472 | 0.03015 | postive |
| CD27-AS1 | 3.61437 | 0.30581 | 0.0017 | postive |
| AC102953.2 | 0.72202 | 0.30991 | 0.64997 | postive |
| AC108134.1 | 1.04672 | 0.31246 | 0.43771 | postive |
| SBF2-AS1 | 0.86112 | 0.31389 | 0.06949 | postive |
| PSORS1C3 | 0.99879 | 0.31782 | 0.53496 | postive |
| AC115618.2 | 7.17643 | 0.31914 | 0.0156 | postive |
| AC080013.4 | 1.11186 | 0.3192 | 0.73979 | postive |
| AL391834.2 | 2.41702 | 0.32422 | 0.13661 | postive |
| AC135050.5 | 0.89472 | 0.32476 | 0.77565 | postive |
| DCST1-AS1 | 1.29693 | 0.32806 | 0.36409 | postive |
| TMEM161B-AS1 | 1.09327 | 0.32995 | 0.58365 | postive |
| YTHDF3-AS1 | 1.11849 | 0.33093 | 0.50863 | postive |
| ZNF529-AS1 | 0.71871 | 0.33149 | 0.70857 | postive |
| AC004477.3 | 0.42234 | 0.33649 | 0.52922 | postive |
| AC011451.1 | 1.17075 | 0.33754 | 0.03738 | postive |
| AC008966.1 | 0.79933 | 0.34108 | 0.01442 | postive |
| IER3-AS1 | 0.77607 | 0.34311 | 0.39682 | postive |
| AC017074.1 | 2.21426 | 0.34946 | 0.24261 | postive |
| APTR | 3.07112 | 0.35034 | 0.00017 | postive |
| MAPKAPK5-AS1 | 8.0258 | 0.35194 | 3.08E-06 | postive |
| AC106876.1 | 5.33276 | 0.35341 | 0.17899 | postive |
| AL138756.1 | 1.41503 | 0.3546 | 0.05835 | postive |
| MEG3 | 0.86741 | 0.35502 | 0.68748 | postive |
| NCK1-DT | 1.45606 | 0.35846 | 0.00132 | postive |
| AC012313.1 | 1.54558 | 0.36309 | 0.00275 | postive |
| AC092171.2 | 2.81776 | 0.36838 | 0.01181 | postive |
| ASB16-AS1 | 2.57839 | 0.37691 | 8.20E-05 | postive |
| AP002840.2 | 0.75724 | 0.37842 | 0.06507 | postive |
| AL606489.1 | 1.88197 | 0.38425 | 0.29418 | postive |
| AL450263.1 | 0.50195 | 0.38819 | 0.83844 | postive |
| LINC02562 | 2.90004 | 0.3922 | 0.12248 | postive |
| AC069281.2 | 0.83496 | 0.39528 | 0.00793 | postive |
| AC108673.2 | 0.50391 | 0.39592 | 0.07345 | postive |
| AC012615.6 | 0.552 | 0.40151 | 0.03283 | postive |
| AC040970.1 | 0.91095 | 0.4044 | 0.14947 | postive |
| AL023284.4 | 5.46179 | 0.40502 | 0.06427 | postive |
| AC025165.5 | 1.06163 | 0.40825 | 0.02674 | postive |
| AC067838.1 | 1.14377 | 0.40884 | 0.03996 | postive |
| AC005005.3 | 0.42306 | 0.40921 | 0.12815 | postive |
| AL132989.1 | 1.06079 | 0.40931 | 0.15543 | postive |
| AL117336.2 | 0.51173 | 0.41169 | 0.10311 | postive |
| AL133367.1 | 0.44262 | 0.42132 | 0.15671 | postive |
| LINC01004 | 1.62981 | 0.42198 | 0.52208 | postive |
| AL445524.1 | 3.77391 | 0.42274 | 0.01589 | postive |
| AC104113.1 | 0.74236 | 0.42739 | 0.07274 | postive |
| KMT2E-AS1 | 2.73728 | 0.43068 | 0.01065 | postive |
| AC011477.2 | 1.41435 | 0.43276 | 0.02924 | postive |
| AL359921.2 | 0.90348 | 0.43291 | 0.00538 | postive |
| AC068888.1 | 0.74432 | 0.43447 | 0.0037 | postive |
| AC007566.1 | 0.52723 | 0.43518 | 0.44945 | postive |
| AC090425.2 | 0.8697 | 0.43771 | 0.07592 | postive |
| TMEM9B-AS1 | 0.97193 | 0.43938 | 0.03401 | postive |
| AL365330.1 | 0.97204 | 0.43946 | 0.00855 | postive |
| AC005586.1 | 2.21194 | 0.44084 | 0.12651 | postive |
| BACE1-AS | 2.11366 | 0.44215 | 0.00026 | postive |
| AC020663.2 | 0.89595 | 0.44391 | 0.82391 | postive |
| AC005911.1 | 0.42289 | 0.44476 | 0.36375 | postive |
| AC004812.2 | 0.9801 | 0.44692 | 0.00017 | postive |
| MIR210HG | 2.51454 | 0.45268 | 0.24751 | postive |
| LINC01089 | 1.30842 | 0.45554 | 0.00833 | postive |
| IQCH-AS1 | 0.78061 | 0.45564 | 0.00014 | postive |
| AC005034.4 | 3.25278 | 0.45781 | 3.64E-05 | postive |
| AP003068.1 | 0.69056 | 0.46481 | 0.02347 | postive |
| AC139795.2 | 0.83515 | 0.47507 | 0.00608 | postive |
| AC026471.4 | 1.99364 | 0.4841 | 0.00685 | postive |
| OSER1-DT | 3.1541 | 0.48603 | 0.32603 | postive |
| AC003070.1 | 2.45343 | 0.48795 | 0.00519 | postive |
| AC108010.1 | 1.13435 | 0.49019 | 0.84702 | postive |
| PXN-AS1 | 0.91195 | 0.49057 | 1.01E-06 | postive |
| AL354733.3 | 0.70837 | 0.4961 | 0.36061 | postive |
| AC008982.2 | 0.54107 | 0.4967 | 0.34019 | postive |
| AL035661.1 | 8.59165 | 0.4981 | 0.08566 | postive |
| AC107375.1 | 0.74864 | 0.50277 | 0.01357 | postive |
| AL157392.3 | 0.44591 | 0.50306 | 0.43191 | postive |
| AC096921.2 | 0.38799 | 0.51195 | 0.10242 | postive |
| AC007255.1 | 1.6212 | 0.51326 | 0.03168 | postive |
| AL021707.8 | 0.73012 | 0.51599 | 0.20408 | postive |
| NUTM2B-AS1 | 0.53327 | 0.51749 | 0.10831 | postive |
| AL133406.2 | 0.57566 | 0.52032 | 0.02422 | postive |
| AC107027.3 | 0.65481 | 0.52244 | 0.00029 | postive |
| AC002553.1 | 0.85872 | 0.52269 | 0.15704 | postive |
| AC009318.2 | 0.84552 | 0.52347 | 0.00647 | postive |
| ZNF674-AS1 | 1.31161 | 0.52726 | 8.80E-06 | postive |
| LINC01003 | 2.66756 | 0.52917 | 0.00394 | postive |
| PPP1R26-AS1 | 0.96338 | 0.53645 | 0.00288 | postive |
| AL450384.2 | 0.4738 | 0.53669 | 0.01218 | postive |
| AC087752.4 | 0.37375 | 0.53736 | 0.19685 | postive |
| MKLN1-AS | 0.86278 | 0.53774 | 4.93E-06 | postive |
| LINC02298 | 2.49321 | 0.53933 | 0.00125 | postive |
| AL356356.1 | 0.73243 | 0.54391 | 0.35244 | postive |
| LINC00997 | 1.0693 | 0.54526 | 0.00102 | postive |
| AL117336.1 | 0.37899 | 0.54634 | 0.62536 | postive |
| AC127502.2 | 0.46278 | 0.54801 | 0.01608 | postive |
| AC092279.1 | 0.68 | 0.55055 | 0.21145 | postive |
| AC096992.2 | 0.49389 | 0.55267 | 0.00074 | postive |
| AL731571.1 | 0.40717 | 0.55496 | 0.0083 | postive |
| AC009053.2 | 0.46737 | 0.55684 | 0.01012 | postive |
| AL596202.1 | 0.43974 | 0.55709 | 0.00683 | postive |
| AL121839.2 | 0.47562 | 0.55978 | 0.42679 | postive |
| ASH1L-AS1 | 1.11327 | 0.56792 | 1.72E-05 | postive |
| AC009318.3 | 0.46205 | 0.57107 | 0.31215 | postive |
| CCDC183-AS1 | 0.756 | 0.57393 | 0.00356 | postive |
| AC005229.4 | 0.72737 | 0.57478 | 5.81E-07 | postive |
| AC012467.2 | 1.26735 | 0.57831 | 3.52E-08 | postive |
| UBR5-AS1 | 1.83427 | 0.57928 | 0.00068 | postive |
| AC036214.2 | 0.8384 | 0.57989 | 0.00332 | postive |
| OCIAD1-AS1 | 0.34593 | 0.58019 | 0.49522 | postive |
| AC020915.3 | 0.96163 | 0.58057 | 0.00014 | postive |
| AC064807.1 | 1.04217 | 0.58788 | 1.94E-05 | postive |
| AC090589.3 | 0.74343 | 0.58988 | 0.00799 | postive |
| TONSL-AS1 | 0.60809 | 0.59099 | 0.00173 | postive |
| AL139011.1 | 0.4332 | 0.59143 | 0.00305 | postive |
| AC022167.2 | 0.59121 | 0.59469 | 1.14E-05 | postive |
| AC009041.3 | 0.43024 | 0.59617 | 0.01272 | postive |
| LINC01806 | 0.85674 | 0.59639 | 0.00415 | postive |
| TBILA | 0.82338 | 0.59655 | 0.14978 | postive |
| AC113410.2 | 0.42874 | 0.59766 | 0.29611 | postive |
| AC022306.2 | 0.85244 | 0.59819 | 0.01748 | postive |
| EBLN3P | 6.90906 | 0.59983 | 1.90E-09 | postive |
| NNT-AS1 | 1.36999 | 0.60629 | 1.50E-06 | postive |
| AC009118.3 | 0.6844 | 0.61046 | 0.0003 | postive |
| AC138696.2 | 1.2448 | 0.61123 | 0.00448 | postive |
| AC132872.1 | 1.73658 | 0.61232 | 0.0009 | postive |
| LINC01176 | 0.96652 | 0.61326 | 0.01938 | postive |
| AL592148.3 | 0.34822 | 0.61342 | 0.00091 | postive |
| AL359076.1 | 2.15681 | 0.61769 | 0.01357 | postive |
| AP001830.1 | 0.44167 | 0.6181 | 0.13891 | postive |
| CIRBP-AS1 | 0.76222 | 0.62072 | 0.00057 | postive |
| AC025287.3 | 0.36819 | 0.62561 | 0.09436 | postive |
| AC024896.1 | 2.40276 | 0.6272 | 5.39E-05 | postive |
| LOXL1-AS1 | 0.46907 | 0.62869 | 0.36409 | postive |
| SNHG21 | 0.6278 | 0.63164 | 5.70E-05 | postive |
| AL139287.1 | 3.01803 | 0.63207 | 2.96E-05 | postive |
| AC002550.2 | 0.53765 | 0.6341 | 0.00419 | postive |
| AL136295.6 | 0.61095 | 0.63838 | 0.0061 | postive |
| AC004067.1 | 0.47762 | 0.63957 | 0.00228 | postive |
| AC245060.2 | 0.33169 | 0.64198 | 0.05593 | postive |
| AC097641.2 | 0.39667 | 0.64199 | 0.00814 | postive |
| AL158166.1 | 0.78065 | 0.64708 | 0.28642 | postive |
| AL121992.3 | 0.73271 | 0.64755 | 0.01961 | postive |
| AL513550.1 | 0.6872 | 0.65611 | 0.0001 | postive |
| MIAT | 0.43084 | 0.67262 | 0.94582 | postive |
| AC010168.2 | 0.37314 | 0.67737 | 0.09182 | postive |
| AC093227.1 | 0.84678 | 0.67921 | 3.89E-05 | postive |
| AL360181.2 | 0.85593 | 0.67987 | 0.00058 | postive |
| ZNF213-AS1 | 1.18651 | 0.68308 | 9.44E-10 | postive |
| AC018638.7 | 0.42437 | 0.68858 | 0.46203 | postive |
| AC009403.1 | 1.62873 | 0.69088 | 1.14E-07 | postive |
| AC138956.2 | 0.5492 | 0.69395 | 0.00247 | postive |
| AC009120.2 | 0.80948 | 0.69941 | 0.00045 | postive |
| AC109460.2 | 0.73321 | 0.69992 | 0.00014 | postive |
| AC078883.1 | 0.89346 | 0.70218 | 0.07705 | postive |
| LINC00467 | 1.09955 | 0.70588 | 1.63E-07 | postive |
| AC004839.1 | 0.75685 | 0.70677 | 0.163 | postive |
| AL391121.1 | 0.82864 | 0.70764 | 0.00395 | postive |
| LINC01184 | 2.71123 | 0.70773 | 6.26E-11 | postive |
| AC004943.2 | 0.74445 | 0.7087 | 1.38E-09 | postive |
| AL157932.1 | 0.4495 | 0.71012 | 0.01279 | postive |
| AC068580.1 | 0.51808 | 0.71086 | 0.00481 | postive |
| AC005253.1 | 0.45284 | 0.71898 | 2.09E-06 | postive |
| AC002553.2 | 0.80563 | 0.72344 | 0.37519 | postive |
| AC006449.2 | 0.37155 | 0.72397 | 0.00488 | postive |
| CCDC18-AS1 | 0.97799 | 0.72477 | 0.00362 | postive |
| AC005261.3 | 1.32708 | 0.72521 | 4.03E-09 | postive |
| AL118506.1 | 0.91725 | 0.73476 | 4.06E-09 | postive |
| SNHG9 | 2.82396 | 0.73717 | 0.00169 | postive |
| AC004080.4 | 0.3645 | 0.74236 | 0.5152 | postive |
| JPX | 2.25294 | 0.74908 | 7.94E-10 | postive |
| AP001505.1 | 3.01083 | 0.7495 | 6.89E-07 | postive |
| AL121894.2 | 0.38683 | 0.7581 | 0.00431 | postive |
| SREBF2-AS1 | 0.91256 | 0.75945 | 5.61E-11 | postive |
| LINC01106 | 0.49395 | 0.76148 | 6.99E-05 | postive |
| AC253536.3 | 0.37531 | 0.76326 | 0.14579 | postive |
| AC006001.2 | 0.80938 | 0.76437 | 8.53E-06 | postive |
| DANCR | 14.3183 | 0.76659 | 2.91E-09 | postive |
| PRKCQ-AS1 | 0.78999 | 0.77306 | 2.86E-06 | postive |
| AC069234.4 | 0.39809 | 0.77476 | 0.04961 | postive |
| CHKB-DT | 0.7091 | 0.77558 | 1.73E-05 | postive |
| MIR155HG | 0.49267 | 0.77638 | 0.02571 | postive |
| AC079414.3 | 0.59393 | 0.77668 | 1.09E-05 | postive |
| ZNF32-AS2 | 0.36843 | 0.77678 | 0.00354 | postive |
| TMEM92-AS1 | 0.33504 | 0.78166 | 5.16E-09 | postive |
| GPRC5D-AS1 | 0.8925 | 0.78479 | 1.58E-09 | postive |
| AP003392.1 | 0.70883 | 0.78562 | 0.00375 | postive |
| AC124045.1 | 0.38925 | 0.78858 | 2.91E-06 | postive |
| AC093297.2 | 1.94004 | 0.79184 | 2.40E-08 | postive |
| AL162586.1 | 0.40661 | 0.7976 | 0.00059 | postive |
| AC073896.3 | 0.48773 | 0.80289 | 1.55E-05 | postive |
| AC114488.1 | 2.91776 | 0.80516 | 0.00117 | postive |
| NFYC-AS1 | 0.44199 | 0.80687 | 2.56E-06 | postive |
| AC139887.2 | 0.61242 | 0.81058 | 2.37E-06 | postive |
| AC084824.5 | 0.6944 | 0.81922 | 0.01637 | postive |
| AC137932.1 | 0.40692 | 0.81948 | 0.40954 | postive |
| AP002807.1 | 0.58096 | 0.82147 | 7.74E-06 | postive |
| AC010260.1 | 0.32911 | 0.8239 | 0.05996 | postive |
| AL390728.6 | 2.75661 | 0.82622 | 0.00128 | postive |
| Z98884.2 | 0.65668 | 0.82648 | 0.00026 | postive |
| AC018690.1 | 0.53277 | 0.83153 | 4.45E-07 | postive |
| AC040169.1 | 0.86206 | 0.83346 | 0.00015 | postive |
| AC138028.4 | 0.62903 | 0.83427 | 8.25E-07 | postive |
| U62317.2 | 2.10662 | 0.83444 | 7.92E-09 | postive |
| AC004908.1 | 0.39679 | 0.83606 | 0.00282 | postive |
| SOS1-IT1 | 0.51084 | 0.83761 | 0.00696 | postive |
| MNX1-AS2 | 0.78076 | 0.83911 | 0.00024 | postive |
| AC055822.1 | 0.46332 | 0.84659 | 0.00048 | postive |
| AC006504.7 | 0.7879 | 0.84659 | 4.51E-05 | postive |
| PAXIP1-AS1 | 3.25031 | 0.84754 | 2.60E-11 | postive |
| AC004148.1 | 0.93391 | 0.85067 | 1.69E-06 | postive |
| AC090517.2 | 0.29042 | 0.85295 | 0.00068 | postive |
| AFDN-DT | 0.43702 | 0.85491 | 3.77E-06 | postive |
| AC005104.1 | 0.62018 | 0.85755 | 0.00089 | postive |
| AL022328.3 | 0.4667 | 0.85803 | 2.43E-05 | postive |
| AC093484.4 | 1.36048 | 0.85882 | 9.26E-06 | postive |
| AL163051.1 | 0.4488 | 0.85957 | 4.03E-08 | postive |
| AC110285.2 | 0.70047 | 0.86003 | 0.17201 | postive |
| AC021078.1 | 0.95563 | 0.86004 | 0.00044 | postive |
| THAP9-AS1 | 3.8452 | 0.86628 | 6.69E-11 | postive |
| AF129075.2 | 0.31502 | 0.8665 | 0.07595 | postive |
| AC005083.1 | 1.67293 | 0.86693 | 8.74E-09 | postive |
| BX322234.1 | 0.31154 | 0.86728 | 0.01382 | postive |
| AC145207.5 | 1.19467 | 0.86795 | 1.46E-09 | postive |
| AC004918.1 | 1.215 | 0.87067 | 6.02E-08 | postive |
| AC002128.1 | 0.31644 | 0.87153 | 0.00031 | postive |
| AP006621.3 | 1.25035 | 0.87333 | 1.05E-07 | postive |
| HMGA1P4 | 0.74191 | 0.87629 | 0.0138 | postive |
| AC100814.1 | 1.47285 | 0.87692 | 0.00023 | postive |
| AC005899.7 | 0.33609 | 0.87911 | 0.05083 | postive |
| ADNP-AS1 | 1.01024 | 0.87968 | 7.42E-05 | postive |
| AC010761.3 | 0.42887 | 0.88008 | 0.47112 | postive |
| AC093157.1 | 0.87068 | 0.88046 | 2.30E-09 | postive |
| AC115618.1 | 0.60545 | 0.88126 | 1.31E-09 | postive |
| GASAL1 | 0.52037 | 0.88464 | 6.59E-07 | postive |
| TNFRSF10A-AS1 | 1.77131 | 0.88732 | 2.42E-06 | postive |
| LINC00342 | 1.79047 | 0.89316 | 0.00136 | postive |
| AL731567.1 | 0.33945 | 0.89828 | 0.12994 | postive |
| AC097639.1 | 0.96176 | 0.89957 | 2.15E-11 | postive |
| AL731566.2 | 0.34689 | 0.90175 | 2.59E-05 | postive |
| AP000240.1 | 0.28289 | 0.90246 | 0.31653 | postive |
| AC093673.1 | 4.57759 | 0.90271 | 9.02E-11 | postive |
| FAM111A-DT | 0.82182 | 0.90455 | 1.37E-17 | postive |
| ZEB1-AS1 | 0.44162 | 0.9067 | 3.46E-09 | postive |
| AC116914.2 | 0.5982 | 0.90978 | 3.06E-05 | postive |
| AC092171.5 | 0.85481 | 0.90989 | 1.49E-07 | postive |
| AC138956.1 | 0.31449 | 0.91022 | 0.03463 | postive |
| TPT1-AS1 | 0.68318 | 0.91041 | 6.31E-05 | postive |
| AL049552.1 | 0.53028 | 0.91073 | 0.1596 | postive |
| DNAJC3-DT | 0.92179 | 0.912 | 4.86E-05 | postive |
| SYNPR-AS1 | 0.93825 | 0.91637 | 4.78E-06 | postive |
| ZNF460-AS1 | 0.43631 | 0.91679 | 2.47E-05 | postive |
| AC245140.2 | 0.50985 | 0.92027 | 1.67E-11 | postive |
| AC232271.1 | 0.40281 | 0.92391 | 9.02E-06 | postive |
| NORAD | 45.469 | 0.92602 | 2.52E-12 | postive |
| AC139887.1 | 0.3767 | 0.92787 | 0.00334 | postive |
| AC009054.2 | 0.48478 | 0.92819 | 0.00318 | postive |
| AC008771.1 | 1.60662 | 0.9285 | 7.94E-13 | postive |
| HCG18 | 1.1601 | 0.9361 | 1.82E-14 | postive |
| AC012467.1 | 0.44922 | 0.93692 | 0.28745 | postive |
| MID1IP1-AS1 | 0.77384 | 0.94011 | 2.70E-05 | postive |
| AC125257.1 | 2.40994 | 0.94345 | 5.48E-15 | postive |
| AC129510.1 | 0.39465 | 0.9446 | 6.57E-05 | postive |
| POLH-AS1 | 0.36325 | 0.9458 | 6.87E-09 | postive |
| AC107068.1 | 0.43184 | 0.94679 | 1.33E-09 | postive |
| AL031714.1 | 0.50444 | 0.95289 | 2.46E-08 | postive |
| AC060780.1 | 1.10892 | 0.95501 | 1.12E-09 | postive |
| AC012073.1 | 0.62659 | 0.95562 | 1.58E-13 | postive |
| Z95115.1 | 0.67799 | 0.96176 | 1.40E-11 | postive |
| AC023043.4 | 0.54001 | 0.96272 | 2.83E-07 | postive |
| AC009120.3 | 0.57328 | 0.97087 | 0.00588 | postive |
| AC120053.1 | 1.1282 | 0.97458 | 4.99E-07 | postive |
| AL137003.1 | 0.58542 | 0.97962 | 7.54E-07 | postive |
| AC100861.1 | 0.97243 | 0.98109 | 1.15E-12 | postive |
| AL391834.1 | 0.74867 | 0.98275 | 7.11E-05 | postive |
| AC026124.2 | 0.37218 | 0.98293 | 0.5016 | postive |
| AL121772.3 | 0.98405 | 0.98295 | 0.0946 | postive |
| DICER1-AS1 | 0.41382 | 0.98628 | 2.72E-10 | postive |
| AP003774.2 | 6.73792 | 0.98735 | 0.22039 | postive |
| C1RL-AS1 | 0.44979 | 0.98833 | 2.41E-05 | postive |
| RNASEH1-AS1 | 2.80679 | 0.99505 | 3.02E-15 | postive |
| LINC01503 | 0.44887 | 0.99596 | 1.29E-06 | postive |
| AC020558.2 | 0.32924 | 0.9968 | 2.95E-06 | postive |
| AL121895.2 | 0.34323 | 1.0007 | 0.01219 | postive |
| AL021707.6 | 1.60682 | 1.00204 | 5.56E-07 | postive |
| INE1 | 0.86315 | 1.00529 | 1.11E-05 | postive |
| SP2-AS1 | 0.36019 | 1.00705 | 6.41E-10 | postive |
| AL133520.1 | 0.77976 | 1.00958 | 5.16E-07 | postive |
| AL357079.1 | 0.47741 | 1.01171 | 6.40E-07 | postive |
| AL031186.1 | 0.42598 | 1.01596 | 1.53E-07 | postive |
| AC115522.1 | 0.27824 | 1.01724 | 6.28E-06 | postive |
| AL118505.1 | 1.36629 | 1.01725 | 4.20E-05 | postive |
| AC008760.1 | 0.64022 | 1.01825 | 7.28E-09 | postive |
| DIO3OS | 1.43092 | 1.02109 | 0.0362 | postive |
| AL049840.2 | 0.92071 | 1.02974 | 0.00182 | postive |
| AC109322.1 | 0.62748 | 1.03419 | 5.32E-13 | postive |
| AC011468.1 | 0.64283 | 1.03509 | 4.93E-06 | postive |
| AC253536.6 | 0.42198 | 1.03732 | 7.13E-07 | postive |
| WNT5A-AS1 | 0.34128 | 1.03807 | 0.00582 | postive |
| AC091729.3 | 0.98822 | 1.03935 | 6.40E-11 | postive |
| AC027228.2 | 0.40944 | 1.04439 | 3.85E-09 | postive |
| MCM3AP-AS1 | 0.32648 | 1.04452 | 2.11E-13 | postive |
| DLEU1 | 0.53237 | 1.04626 | 1.46E-08 | postive |
| OGFRP1 | 0.40205 | 1.04765 | 2.68E-14 | postive |
| AC073957.3 | 0.7198 | 1.04915 | 1.88E-05 | postive |
| AC145207.8 | 0.26105 | 1.04937 | 0.00324 | postive |
| AL035071.1 | 1.86622 | 1.05189 | 1.38E-08 | postive |
| AC132872.3 | 0.88623 | 1.05681 | 2.36E-07 | postive |
| AC074117.1 | 0.96386 | 1.06154 | 8.92E-14 | postive |
| AC020765.2 | 0.42368 | 1.06303 | 4.76E-07 | postive |
| AL034550.1 | 0.38183 | 1.06835 | 0.00173 | postive |
| AP000873.2 | 0.26988 | 1.07899 | 3.34E-06 | postive |
| HOXB-AS2 | 0.53405 | 1.08033 | 0.69552 | postive |
| AC000123.1 | 0.92167 | 1.08061 | 9.02E-07 | postive |
| ARHGAP27P1-BPTFP1-KPNA2P3 | 0.70975 | 1.08805 | 2.09E-07 | postive |
| AL157786.1 | 0.47714 | 1.08975 | 0.06766 | postive |
| AC099518.2 | 0.30534 | 1.09182 | 7.54E-06 | postive |
| AC091057.1 | 0.48533 | 1.09228 | 1.55E-11 | postive |
| AC005261.1 | 3.00103 | 1.09317 | 2.75E-14 | postive |
| PTOV1-AS2 | 1.28323 | 1.0937 | 8.63E-11 | postive |
| ZNF433-AS1 | 0.36901 | 1.09682 | 7.92E-15 | postive |
| AP000254.1 | 0.38465 | 1.09757 | 0.00493 | postive |
| THUMPD3-AS1 | 1.21171 | 1.0977 | 6.45E-11 | postive |
| LINC01138 | 0.40682 | 1.10774 | 6.14E-13 | postive |
| AC005837.3 | 0.67667 | 1.10778 | 1.17E-06 | postive |
| LINC00265 | 1.01927 | 1.10896 | 2.50E-10 | postive |
| AC087588.2 | 0.48251 | 1.11316 | 9.83E-05 | postive |
| AC009065.3 | 7.80971 | 1.12126 | 3.49E-14 | postive |
| AC022211.2 | 0.41397 | 1.12424 | 0.00048 | postive |
| TRIM31-AS1 | 1.36667 | 1.12602 | 9.56E-09 | postive |
| AP006621.4 | 0.27704 | 1.12894 | 0.00081 | postive |
| AC004982.2 | 0.62301 | 1.12933 | 8.27E-13 | postive |
| AC004908.2 | 0.40154 | 1.13448 | 5.22E-07 | postive |
| AC063948.1 | 0.28634 | 1.13463 | 5.96E-06 | postive |
| CR936218.1 | 0.54412 | 1.13606 | 0.11406 | postive |
| AC141002.1 | 0.25324 | 1.13887 | 0.00032 | postive |
| AL606834.1 | 0.37018 | 1.14244 | 2.29E-05 | postive |
| AC008610.1 | 0.7982 | 1.14407 | 1.08E-08 | postive |
| AC004241.3 | 0.43579 | 1.14438 | 4.47E-08 | postive |
| AC130456.3 | 0.45309 | 1.15084 | 1.89E-05 | postive |
| LINC00174 | 0.53619 | 1.15171 | 1.23E-10 | postive |
| AL136221.1 | 0.39667 | 1.15753 | 0.40402 | postive |
| AL355075.2 | 0.397 | 1.15821 | 2.66E-05 | postive |
| PAN3-AS1 | 0.48323 | 1.15908 | 1.56E-08 | postive |
| AC002128.2 | 0.28304 | 1.15943 | 0.00274 | postive |
| AL355488.1 | 0.74099 | 1.16086 | 4.99E-06 | postive |
| AL390726.4 | 0.28906 | 1.16223 | 0.00027 | postive |
| AL928654.2 | 1.15473 | 1.16366 | 2.48E-07 | postive |
| AC009065.6 | 7.1883 | 1.16404 | 5.52E-15 | postive |
| AC005519.1 | 0.23572 | 1.16499 | 1.35E-06 | postive |
| AL451050.2 | 0.27531 | 1.16521 | 4.32E-08 | postive |
| HAR1A | 0.46522 | 1.16828 | 0.17478 | postive |
| AL157838.1 | 0.26804 | 1.17076 | 0.00021 | postive |
| FMR1-IT1 | 0.35847 | 1.17292 | 0.00668 | postive |
| AC004492.1 | 0.41873 | 1.17935 | 0.03953 | postive |
| AC098851.1 | 0.27548 | 1.18276 | 0.05336 | postive |
| AC092119.2 | 0.46778 | 1.18689 | 8.89E-08 | postive |
| AL355472.1 | 1.44475 | 1.19252 | 0.00131 | postive |
| AC006042.1 | 1.6478 | 1.19271 | 6.02E-07 | postive |
| AL117332.1 | 0.37234 | 1.19581 | 1.20E-11 | postive |
| AC092809.4 | 0.38626 | 1.1997 | 0.00025 | postive |
| AL354696.1 | 0.5718 | 1.2026 | 1.54E-10 | postive |
| AP003419.3 | 0.24222 | 1.20379 | 2.76E-07 | postive |
| AC015849.3 | 0.96214 | 1.20405 | 4.33E-06 | postive |
| AC007688.2 | 0.35419 | 1.2133 | 0.00016 | postive |
| AGAP2-AS1 | 2.28198 | 1.21819 | 1.25E-11 | postive |
| AL513327.1 | 0.27212 | 1.2213 | 0.00011 | postive |
| AL022322.1 | 0.72479 | 1.22132 | 9.91E-08 | postive |
| AP003390.1 | 0.59936 | 1.22429 | 2.44E-06 | postive |
| AC005041.3 | 0.32664 | 1.22892 | 9.63E-09 | postive |
| AC019080.5 | 0.36939 | 1.23748 | 1.58E-07 | postive |
| AP006621.2 | 0.65192 | 1.23887 | 5.05E-05 | postive |
| AL031670.1 | 0.35536 | 1.24069 | 0.00082 | postive |
| AC000120.1 | 0.54615 | 1.24278 | 0.13645 | postive |
| GABPB1-AS1 | 0.52473 | 1.24462 | 3.85E-07 | postive |
| LENG8-AS1 | 0.998 | 1.24764 | 1.54E-14 | postive |
| AC008870.2 | 0.28188 | 1.25695 | 3.72E-09 | postive |
| SNHG20 | 0.96647 | 1.27145 | 2.15E-18 | postive |
| ZKSCAN2-DT | 0.42169 | 1.28347 | 2.24E-09 | postive |
| PSPC1-AS2 | 0.39276 | 1.28463 | 1.74E-05 | postive |
| AC004253.1 | 0.34367 | 1.29248 | 1.04E-06 | postive |
| AC125807.2 | 0.67094 | 1.29458 | 4.10E-16 | postive |
| AC132192.2 | 0.41768 | 1.30633 | 6.80E-12 | postive |
| AC018695.4 | 0.22275 | 1.30884 | 6.34E-07 | postive |
| AC027796.4 | 0.41093 | 1.30884 | 1.39E-09 | postive |
| AC007342.5 | 0.53485 | 1.32238 | 1.70E-08 | postive |
| AC011462.4 | 0.34153 | 1.32475 | 3.82E-10 | postive |
| AC079907.1 | 0.23373 | 1.32688 | 5.86E-10 | postive |
| NCBP2-AS1 | 0.22881 | 1.33253 | 5.81E-06 | postive |
| AC010834.3 | 0.46716 | 1.33402 | 4.99E-06 | postive |
| AC020916.1 | 6.09285 | 1.33696 | 1.06E-11 | postive |
| STAG3L5P-PVRIG2P-PILRB | 0.27996 | 1.34034 | 1.20E-11 | postive |
| AC087741.1 | 0.32416 | 1.34171 | 1.34E-10 | postive |
| SNHG11 | 2.00484 | 1.35018 | 5.07E-18 | postive |
| AC048341.2 | 0.56523 | 1.35464 | 6.06E-10 | postive |
| AC137630.3 | 0.23779 | 1.35573 | 0.0036 | postive |
| AL133410.1 | 0.36275 | 1.35715 | 3.99E-12 | postive |
| AC018809.1 | 0.22677 | 1.35922 | 6.36E-06 | postive |
| AL390719.2 | 5.75731 | 1.36233 | 1.04E-09 | postive |
| LINC00106 | 0.89172 | 1.36338 | 6.25E-08 | postive |
| AL161772.1 | 0.38379 | 1.36523 | 5.32E-12 | postive |
| AC007038.1 | 0.46281 | 1.36647 | 2.43E-07 | postive |
| CASC9 | 1.85597 | 1.36801 | 6.33E-06 | postive |
| MIR222HG | 0.63763 | 1.37027 | 3.49E-08 | postive |
| AL390208.1 | 0.23089 | 1.37316 | 0.21388 | postive |
| GAS5 | 23.0675 | 1.37814 | 6.63E-19 | postive |
| LINC01355 | 0.39874 | 1.38063 | 1.24E-07 | postive |
| AC084125.4 | 0.3979 | 1.38207 | 1.09E-06 | postive |
| AL353796.1 | 0.26791 | 1.39201 | 1.09E-14 | postive |
| AL139407.1 | 0.21482 | 1.39227 | 0.78741 | postive |
| AC090181.2 | 0.71145 | 1.39233 | 0.29569 | postive |
| AL121601.1 | 0.21896 | 1.39296 | 4.82E-06 | postive |
| AL391244.2 | 0.69311 | 1.39307 | 1.63E-18 | postive |
| AC004585.1 | 0.29527 | 1.40113 | 2.06E-12 | postive |
| AC012442.1 | 1.68142 | 1.40494 | 1.80E-13 | postive |
| SNHG7 | 3.86313 | 1.40536 | 4.93E-18 | postive |
| AC018653.3 | 0.43854 | 1.40946 | 3.25E-10 | postive |
| AP000692.1 | 0.20811 | 1.41187 | 1.07E-05 | postive |
| AC106820.3 | 0.22184 | 1.41359 | 9.33E-09 | postive |
| AC233728.1 | 0.25808 | 1.41753 | 1.45E-08 | postive |
| ACBD3-AS1 | 0.3307 | 1.41823 | 2.46E-05 | postive |
| AL031985.3 | 0.45572 | 1.42149 | 9.53E-18 | postive |
| AC092171.4 | 0.31471 | 1.42262 | 4.66E-09 | postive |
| MMP25-AS1 | 0.36628 | 1.4262 | 2.76E-11 | postive |
| AC010761.1 | 0.9205 | 1.42877 | 2.36E-16 | postive |
| AC124283.2 | 0.3227 | 1.42911 | 1.67E-11 | postive |
| LINC01235 | 0.23604 | 1.42971 | 1.79E-06 | postive |
| AC008115.3 | 0.73267 | 1.43349 | 3.27E-10 | postive |
| SMIM25 | 0.65891 | 1.43562 | 1.18E-12 | postive |
| LINC01558 | 0.57689 | 1.43576 | 1.24E-05 | postive |
| ANKRD10-IT1 | 4.23849 | 1.4418 | 4.93E-06 | postive |
| SNHG12 | 1.83803 | 1.44406 | 4.01E-19 | postive |
| AC080129.2 | 0.42068 | 1.45427 | 1.62E-07 | postive |
| AL158166.2 | 0.20042 | 1.4653 | 0.31109 | postive |
| ASMTL-AS1 | 0.87692 | 1.47605 | 1.72E-09 | postive |
| AL162430.2 | 0.2108 | 1.49553 | 1.63E-09 | postive |
| CYTOR | 0.96217 | 1.49572 | 7.69E-19 | postive |
| MIRLET7BHG | 0.20284 | 1.49926 | 1.52E-09 | postive |
| RUSC1-AS1 | 0.81525 | 1.49928 | 7.43E-14 | postive |
| AC108058.1 | 0.27142 | 1.51157 | 0.01145 | postive |
| AC073611.1 | 0.40242 | 1.51873 | 9.13E-21 | postive |
| SNHG16 | 2.10106 | 1.52607 | 7.34E-25 | postive |
| AL442125.2 | 0.19276 | 1.5264 | 0.0027 | postive |
| AC093788.1 | 0.25089 | 1.52715 | 6.60E-08 | postive |
| AC007938.3 | 0.27672 | 1.52978 | 4.25E-10 | postive |
| AL121832.2 | 1.13798 | 1.53215 | 1.28E-15 | postive |
| AC145285.6 | 0.20707 | 1.53721 | 1.54E-12 | postive |
| Z68871.1 | 0.22331 | 1.5378 | 1.43E-08 | postive |
| AL049869.3 | 0.22883 | 1.53862 | 0.25509 | postive |
| AC080162.1 | 0.19499 | 1.53864 | 0.86483 | postive |
| AP001469.3 | 0.36747 | 1.54101 | 3.59E-19 | postive |
| AP003352.1 | 0.82926 | 1.5414 | 8.48E-19 | postive |
| AC124067.4 | 3.33105 | 1.54213 | 2.88E-11 | postive |
| AC114296.1 | 0.21173 | 1.5437 | 0.02397 | postive |
| AP005899.1 | 0.22309 | 1.5576 | 0.00011 | postive |
| MCF2L-AS1 | 2.47069 | 1.56126 | 2.09E-13 | postive |
| HM13-IT1 | 0.5313 | 1.56714 | 1.57E-11 | postive |
| AC020915.2 | 0.24323 | 1.56816 | 4.68E-05 | postive |
| AC073487.1 | 0.21686 | 1.57468 | 1.90E-05 | postive |
| AL662797.1 | 0.29046 | 1.59314 | 0.24527 | postive |
| AL031716.1 | 0.3185 | 1.59749 | 3.25E-10 | postive |
| TSPOAP1-AS1 | 0.33067 | 1.6098 | 2.88E-10 | postive |
| AC015813.1 | 0.94476 | 1.6119 | 1.54E-10 | postive |
| GAPLINC | 0.2139 | 1.62835 | 9.02E-13 | postive |
| AC084117.1 | 0.23764 | 1.63069 | 4.55E-05 | postive |
| AL354836.1 | 0.91709 | 1.63325 | 4.37E-16 | postive |
| MIR4435-2HG | 0.63568 | 1.63822 | 5.17E-22 | postive |
| AL031673.1 | 0.40346 | 1.63899 | 2.81E-09 | postive |
| SNHG3 | 3.51922 | 1.64028 | 7.68E-20 | postive |
| HNF4A-AS1 | 0.36113 | 1.64591 | 0.28852 | postive |
| AC131009.3 | 1.15683 | 1.65171 | 4.13E-19 | postive |
| AP000786.1 | 0.20634 | 1.65442 | 0.01963 | postive |
| LINC00114 | 0.24665 | 1.65524 | 1.13E-05 | postive |
| AC245884.8 | 0.37343 | 1.66869 | 6.34E-12 | postive |
| AF117829.1 | 0.20863 | 1.66998 | 1.05E-12 | postive |
| AC087276.2 | 0.29274 | 1.67281 | 0.46636 | postive |
| AC010973.2 | 0.26937 | 1.67689 | 1.08E-15 | postive |
| ALG13-AS1 | 0.33767 | 1.69425 | 0.03818 | postive |
| AL139349.1 | 0.32439 | 1.69444 | 1.56E-08 | postive |
| AC093585.1 | 0.16899 | 1.70018 | 0.006 | postive |
| AL133243.2 | 0.40495 | 1.70257 | 1.42E-05 | postive |
| AC022150.4 | 0.20664 | 1.70751 | 0.04336 | postive |
| AL590723.1 | 0.20621 | 1.72625 | 0.00123 | postive |
| AC127024.5 | 0.67291 | 1.72943 | 1.04E-12 | postive |
| LINC01311 | 0.24907 | 1.73977 | 1.36E-17 | postive |
| AL031600.1 | 0.26414 | 1.74414 | 2.50E-11 | postive |
| AC010536.2 | 0.25651 | 1.74702 | 0.01262 | postive |
| AC245100.7 | 0.18811 | 1.75061 | 8.07E-07 | postive |
| LINC-PINT | 0.48413 | 1.7599 | 1.93E-12 | postive |
| AC090739.1 | 0.35768 | 1.76508 | 0.00015 | postive |
| AL137782.1 | 0.24037 | 1.76773 | 1.05E-13 | postive |
| AC093620.1 | 0.42137 | 1.76915 | 2.75E-12 | postive |
| AC091588.1 | 0.2119 | 1.77089 | 0.18037 | postive |
| AL117379.1 | 0.47714 | 1.77172 | 3.41E-10 | postive |
| LINC00513 | 0.65676 | 1.77333 | 1.12E-08 | postive |
| AP002907.1 | 0.20009 | 1.78415 | 8.89E-08 | postive |
| AP002336.2 | 0.1652 | 1.78715 | 1.18E-10 | postive |
| AC068790.5 | 0.15457 | 1.78801 | 0.00045 | postive |
| AC004232.2 | 0.19686 | 1.79321 | 3.17E-14 | postive |
| AC008735.2 | 1.35169 | 1.79478 | 3.27E-10 | postive |
| AL354993.2 | 0.18435 | 1.79721 | 0.0014 | postive |
| AC004264.1 | 0.226 | 1.80183 | 2.45E-15 | postive |
| NEAT1 | 10.8081 | 1.80997 | 0.00596 | postive |
| AL121832.3 | 0.22728 | 1.81426 | 4.93E-15 | postive |
| LINC01232 | 0.33275 | 1.81885 | 1.17E-19 | postive |
| MIR3142HG | 0.49246 | 1.8216 | 9.75E-09 | postive |
| N4BP2L2-IT2 | 0.2588 | 1.82523 | 5.21E-05 | postive |
| TMEM147-AS1 | 0.62637 | 1.82571 | 1.45E-20 | postive |
| AC018628.2 | 0.2018 | 1.82952 | 1.18E-08 | postive |
| UBE2R2-AS1 | 0.17637 | 1.83613 | 2.73E-06 | postive |
| AL162724.2 | 0.20518 | 1.83639 | 2.65E-05 | postive |
| AC127024.4 | 0.40527 | 1.83708 | 2.60E-08 | postive |
| DLEU2 | 0.34231 | 1.85579 | 5.58E-13 | postive |
| AC089999.2 | 0.26305 | 1.8635 | 0.01812 | postive |
| TUSC8 | 0.85931 | 1.86877 | 1.65E-06 | postive |
| ATP2A1-AS1 | 0.38025 | 1.88764 | 8.98E-15 | postive |
| AP001160.1 | 0.20378 | 1.89003 | 9.62E-18 | postive |
| AC121761.1 | 0.26838 | 1.90232 | 4.20E-14 | postive |
| MHENCR | 2.25888 | 1.90538 | 4.81E-19 | postive |
| NKILA | 0.34294 | 1.90604 | 2.00E-11 | postive |
| ZFAS1 | 17.4569 | 1.91016 | 2.19E-23 | postive |
| AL139089.1 | 0.38886 | 1.92009 | 4.76E-15 | postive |
| LINC02487 | 0.30798 | 1.92239 | 7.57E-12 | postive |
| SNHG1 | 4.04236 | 1.92845 | 1.86E-23 | postive |
| AL080317.1 | 0.14948 | 1.93554 | 4.80E-10 | postive |
| AC025857.2 | 1.26942 | 1.93703 | 4.74E-19 | postive |
| SNHG15 | 2.19805 | 1.93972 | 3.74E-25 | postive |
| AP000866.6 | 0.14241 | 1.96017 | 1.55E-06 | postive |
| SNHG4 | 0.91558 | 1.96676 | 7.46E-19 | postive |
| AP001628.1 | 0.21133 | 1.96893 | 5.51E-09 | postive |
| MNX1-AS1 | 1.07249 | 1.99446 | 5.33E-20 | postive |
| LINC01315 | 1.03085 | 1.99828 | 8.42E-17 | postive |
| AL138689.1 | 0.30405 | 2.00664 | 2.54E-06 | postive |
| AL033519.3 | 0.55394 | 2.00846 | 4.82E-07 | postive |
| AL161891.1 | 0.13942 | 2.02819 | 4.35E-17 | postive |
| AC020978.3 | 0.13971 | 2.02981 | 0.00089 | postive |
| LINC01473 | 0.19718 | 2.0387 | 7.31E-10 | postive |
| AL117382.2 | 2.64952 | 2.03969 | 1.00E-08 | postive |
| LINC01876 | 0.15442 | 2.07344 | 0.00023 | postive |
| RHPN1-AS1 | 0.19421 | 2.08669 | 4.21E-16 | postive |
| ABALON | 0.18147 | 2.11958 | 4.34E-23 | postive |
| AC020907.4 | 0.28083 | 2.12198 | 2.34E-14 | postive |
| AC080112.1 | 0.16174 | 2.15207 | 1.44E-06 | postive |
| GK-AS1 | 0.24765 | 2.15573 | 0.00018 | postive |
| AC092115.2 | 0.16803 | 2.16996 | 1.48E-14 | postive |
| AC026356.1 | 0.18241 | 2.17314 | 3.05E-17 | postive |
| AP001042.1 | 0.11977 | 2.19978 | 2.97E-08 | postive |
| AC087222.1 | 0.12454 | 2.22022 | 3.70E-07 | postive |
| AL596223.2 | 0.12109 | 2.22072 | 5.97E-11 | postive |
| AL117382.1 | 1.31155 | 2.2249 | 0.00025 | postive |
| SLC12A9-AS1 | 0.64315 | 2.22736 | 1.01E-19 | postive |
| AC092338.1 | 0.13423 | 2.22804 | 0.0249 | postive |
| AC103591.3 | 0.34967 | 2.23288 | 5.80E-07 | postive |
| SNHG17 | 2.75376 | 2.23297 | 6.43E-23 | postive |
| SNHG22 | 0.17524 | 2.23416 | 6.89E-07 | postive |
| AL109614.1 | 0.29412 | 2.23451 | 4.25E-08 | postive |
| AL161729.4 | 0.16439 | 2.24673 | 5.32E-12 | postive |
| UNC5B-AS1 | 0.1724 | 2.25317 | 0.00189 | postive |
| Z82243.1 | 0.19043 | 2.26731 | 7.09E-12 | postive |
| AC008750.4 | 0.1154 | 2.28119 | 0.11324 | postive |
| ZDHHC20-IT1 | 0.11785 | 2.28704 | 2.33E-10 | postive |
| AC245014.3 | 0.11024 | 2.29743 | 0.08916 | postive |
| MIR181A2HG | 0.13629 | 2.29812 | 6.95E-09 | postive |
| AC112496.1 | 0.20539 | 2.3095 | 0.00023 | postive |
| AC022144.1 | 0.14644 | 2.31579 | 5.69E-14 | postive |
| AC010719.1 | 0.68474 | 2.33967 | 1.37E-16 | postive |
| AC103706.1 | 0.1578 | 2.35967 | 1.25E-13 | postive |
| AC067930.4 | 0.10382 | 2.3647 | 1.21E-11 | postive |
| AC010280.1 | 0.16388 | 2.37019 | 0.00095 | postive |
| AC145423.2 | 0.11282 | 2.41719 | 9.14E-14 | postive |
| Z83843.1 | 0.61552 | 2.49788 | 4.36E-05 | postive |
| AC000061.1 | 0.16934 | 2.50046 | 9.67E-05 | postive |
| AC004837.2 | 0.1293 | 2.50781 | 3.42E-08 | postive |
| AL355312.3 | 0.09853 | 2.51311 | 6.48E-07 | postive |
| AC108134.3 | 0.40331 | 2.53735 | 6.85E-07 | postive |
| AL133330.1 | 0.1258 | 2.54286 | 5.09E-13 | postive |
| AC104964.1 | 0.0967 | 2.57222 | 2.48E-05 | postive |
| BX470102.1 | 0.9151 | 2.57596 | 2.15E-20 | postive |
| AC021218.1 | 1.4817 | 2.57957 | 7.37E-20 | postive |
| AC009269.5 | 0.09429 | 2.59696 | 0.00093 | postive |
| AC108727.1 | 0.1005 | 2.6019 | 0.01856 | postive |
| VPS9D1-AS1 | 1.2813 | 2.60884 | 4.69E-22 | postive |
| AL021578.1 | 0.14179 | 2.63599 | 3.68E-12 | postive |
| FTX | 0.19337 | 2.67924 | 3.08E-06 | postive |
| PRR7-AS1 | 0.0947 | 2.71066 | 1.11E-21 | postive |
| AC243967.2 | 0.09371 | 2.76741 | 6.26E-07 | postive |
| AL078587.1 | 0.10677 | 2.77553 | 5.55E-11 | postive |
| AL442067.1 | 0.11503 | 2.78632 | 5.17E-08 | postive |
| AL031275.1 | 0.08781 | 2.80066 | 3.04E-05 | postive |
| CD44-AS1 | 0.17017 | 2.81223 | 1.37E-13 | postive |
| AL035071.2 | 0.07978 | 2.84643 | 1.03E-05 | postive |
| AC048344.4 | 0.07404 | 2.88012 | 2.42E-16 | postive |
| AC104958.2 | 0.58836 | 2.88984 | 3.70E-20 | postive |
| AC108865.2 | 0.28557 | 2.89287 | 0.01354 | postive |
| AC011676.1 | 0.08752 | 2.90515 | 3.54E-16 | postive |
| AC058791.1 | 0.17283 | 2.91068 | 8.58E-05 | postive |
| PVT1 | 0.38706 | 2.95566 | 3.96E-26 | postive |
| AL591846.2 | 1.55501 | 2.95609 | 0.01584 | postive |
| ARHGEF38-IT1 | 0.09476 | 2.96085 | 2.71E-09 | postive |
| AL390195.1 | 0.08672 | 3.04757 | 6.14E-05 | postive |
| AC026368.1 | 0.07314 | 3.13405 | 1.67E-15 | postive |
| MAFG-DT | 0.37472 | 3.14503 | 7.86E-25 | postive |
| MIR17HG | 0.15781 | 3.1796 | 4.79E-19 | postive |
| GK-IT1 | 0.06284 | 3.18424 | 1.14E-05 | postive |
| AL353804.2 | 0.06111 | 3.24257 | 7.18E-06 | postive |
| AC113143.1 | 0.06215 | 3.26324 | 0.03016 | postive |
| LMO7-AS1 | 0.07846 | 3.27278 | 1.24E-17 | postive |
| AC007878.1 | 0.12709 | 3.30448 | 0.4441 | postive |
| LINC02195 | 0.05476 | 3.38825 | 9.97E-12 | postive |
| AL138963.1 | 0.09328 | 3.41536 | 0.00022 | postive |
| GAS6-AS1 | 0.21002 | 3.59027 | 2.14E-19 | postive |
| AC136475.3 | 0.58752 | 3.73077 | 6.63E-15 | postive |
| AL136115.2 | 0.05532 | 3.813 | 2.70E-05 | postive |
| AC131971.1 | 0.05337 | 3.82736 | 2.68E-05 | postive |
| AL049539.1 | 0.04823 | 3.85095 | 3.99E-14 | postive |
| TFAP2A-AS1 | 0.04018 | 3.90021 | 2.26E-15 | postive |
| AL163953.1 | 0.07216 | 3.90203 | 2.36E-19 | postive |
| SCARNA9 | 0.46979 | 3.91588 | 2.97E-12 | postive |
| PCCA-AS1 | 0.04154 | 3.92045 | 0.37202 | postive |
| AC124319.1 | 0.1192 | 3.93 | 1.33E-18 | postive |
| AL590483.1 | 0.03742 | 3.94292 | 3.50E-16 | postive |
| MALAT1 | 7.99496 | 4.03926 | 2.45E-08 | postive |
| AC020656.2 | 0.03527 | 4.11808 | 1.29E-16 | postive |
| LINC01748 | 0.07614 | 4.13064 | 2.53E-14 | postive |
| EIF1AX-AS1 | 0.0306 | 4.19515 | 0.0064 | postive |
| AC092112.1 | 0.03403 | 4.22581 | 7.68E-05 | postive |
| AP001429.1 | 0.05664 | 4.2889 | 2.70E-07 | postive |
| AC093732.1 | 0.02984 | 4.28953 | 1.54E-13 | postive |
| AC016831.4 | 0.05057 | 4.29606 | 6.18E-06 | postive |
| AC009032.1 | 0.06994 | 4.37246 | 0.03123 | postive |
| AL359881.1 | 0.04121 | 4.4007 | 3.86E-13 | postive |
| AC008649.2 | 0.05184 | 4.41002 | 0.00101 | postive |
| AC092168.2 | 0.03841 | 4.41888 | 5.24E-07 | postive |
| LINC02595 | 0.04731 | 4.45911 | 1.01E-19 | postive |
| AP005271.1 | 0.02948 | 4.4651 | 2.04E-09 | postive |
| AC090116.1 | 0.0486 | 4.52037 | 6.36E-12 | postive |
| LINC00941 | 0.02385 | 4.72577 | 2.59E-15 | postive |
| SNHG25 | 0.96789 | 4.91091 | 5.61E-20 | postive |
| CASC19 | 0.127 | 5.08774 | 5.91E-25 | postive |
| AC007128.1 | 0.01784 | 5.12664 | 4.12E-22 | postive |
| MACC1-AS1 | 0.01426 | 5.41414 | 0.00204 | postive |
| BLACAT1 | 0.0454 | 5.54424 | 1.20E-24 | postive |
| LINC01614 | 0.01518 | 6.02038 | 1.77E-17 | postive |
| PLAC4 | 0.01098 | 6.08187 | 6.19E-19 | postive |
| LINC00659 | 0.03497 | 6.38412 | 5.28E-24 | postive |
| AC123023.1 | 0.02242 | 6.4692 | 5.20E-20 | postive |
| LINC02577 | 0.0046 | 6.96781 | 4.07E-25 | postive |
| AC005256.1 | 0.00658 | 7.10943 | 2.14E-17 | postive |
| LINC00460 | 0.01247 | 7.20005 | 4.18E-24 | postive |
| LINC01811 | 0.00561 | 7.20749 | 2.40E-19 | postive |
| LINC01705 | 0.00542 | 7.9195 | 1.57E-20 | postive |
| AC104823.1 | 0.01755 | 8.11939 | 2.38E-17 | postive |
| AC007099.1 | 0.00209 | 8.58323 | 6.52E-22 | postive |
| AC105460.1 | 0.01073 | 8.68829 | 3.57E-05 | postive |
| LINC02163 | 0.00293 | 8.82309 | 3.09E-21 | postive |
| AC007608.2 | 0.00137 | 8.84052 | 1.39E-07 | postive |
| AC055717.2 | 0.00299 | 8.97598 | 5.92E-17 | postive |
| LINC02418 | 0.00682 | 9.29444 | 9.20E-20 | postive |
